# Supplementary material
Source: PubMed Central journal article supplement (PMC8881898)
Supplement: 232_2022_218_MOESM1_ESM.pdf [file 232_2022_218_MOESM1_ESM.pdf]

# SUPPLEMENTARY INFORMATION

## Role of Disulfide Bonds in Membrane Partitioning of a Viral Peptide

Samapan Sikdar <sup>1,2,\*</sup>, Manidipa Banerjee <sup>3,\*</sup> and Satyavani Vemparala <sup>1,2,\*</sup>

<sup>1</sup> The Institute of Mathematical Sciences, C.I.T. Campus, Taramani, Chennai 600113, India

<sup>2</sup> Homi Bhabha National Institute, Training School Complex, Anushakti Nagar, Mumbai, 400094, India

<sup>3</sup> Kusuma School of Biological Sciences, Indian Institute of Technology-Delhi, Hauz Khas, New Delhi -110016, India.

\*Corresponding authors:

Email: [samapans@imsc.res.in](mailto:samapans@imsc.res.in); [mbanerjee@bioschool.iitd.ac.in](mailto:mbanerjee@bioschool.iitd.ac.in); [vani@imsc.res.in](mailto:vani@imsc.res.in)

| Systems        | System size | Simulation time (ns) | $n_w$ |
|----------------|-------------|----------------------|-------|
| SS11-47 – POPC | 101395      | 500                  | 69    |
| SS11-52 – POPC | 105965      | 530                  | 74    |
| SS47-52 – POPC | 105941      | 580                  | 74    |

**Table S1** Details of systems considered in the present study. All atom MD simulations of HAV-2B peptide in three possible disulfide (SS) bonded states are performed in POPC bilayer. The system size denoted by total number of atoms; followed by the simulation time and the number of hydrating water molecules / lipid,  $n_w$  are provided as well.

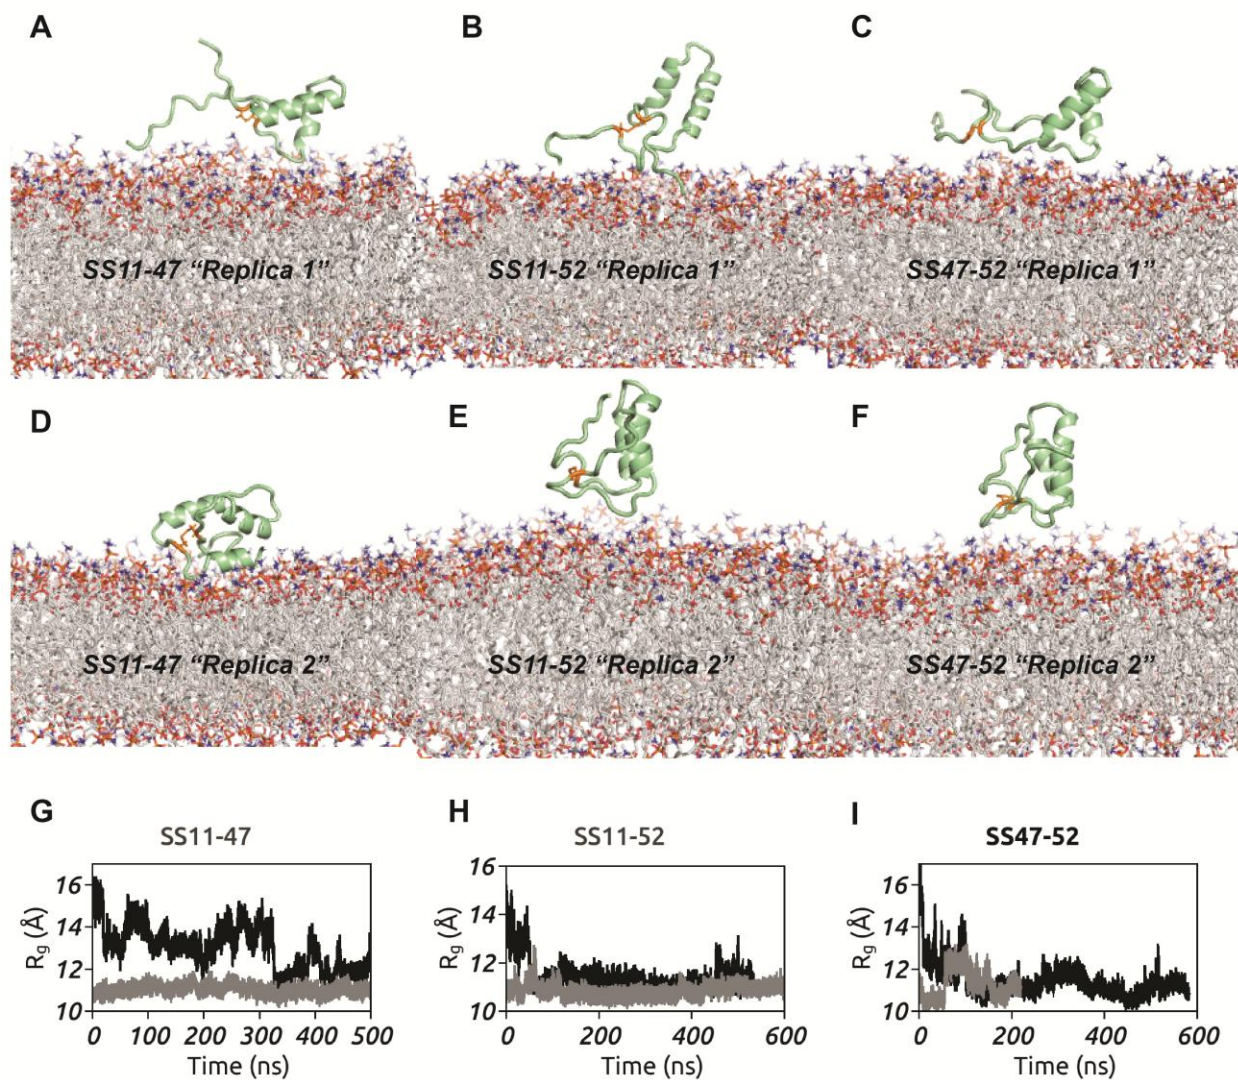

**Fig. S1** The initial peptide-membrane system setups for the three SS-linked states corresponding to two sets of simulations considering different peptide conformations and orientations on POPC bilayer are shown (a-f). The time evolution of radius of gyration,  $R_g$ , from the two sets of simulations (*Replica 1* in black and *Replica 2* in gray) corresponding to the three SS-linked states indicating disulfide bond induced compact conformation of HAV-2B peptide irrespective of differences in initial peptide conformation.

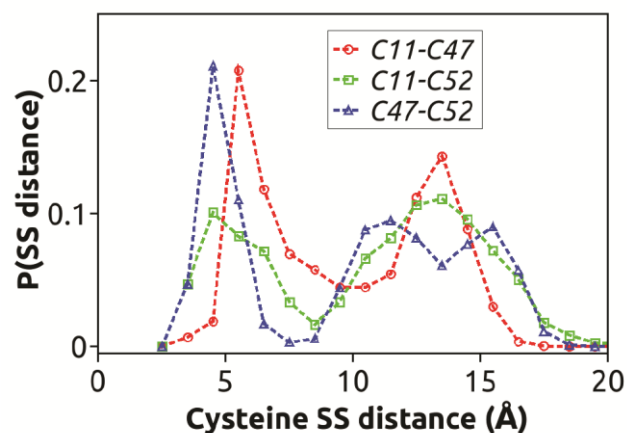

**Fig. S2** Distribution of inter-Cysteine distances calculated considering the thiol “S” atom, from SS-free HAV-2B peptide in water simulation trajectory.

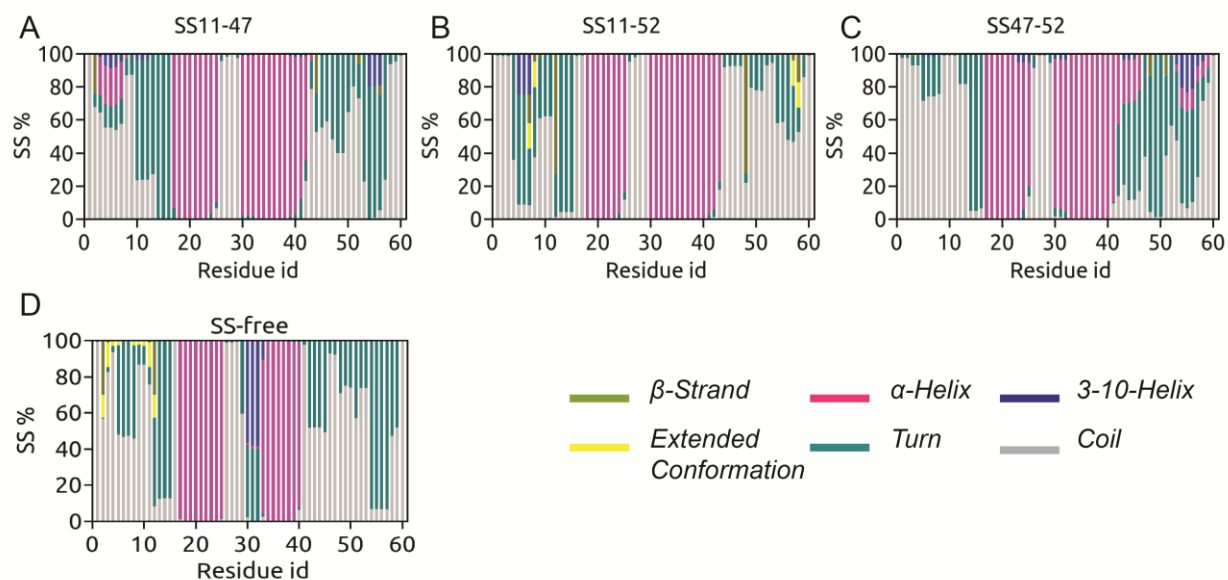

**Fig. S3** Residue based secondary structure percentage % of (A) SS11-47, (B) SS11-52, (C) SS47-52 and (D) SS-free HAV-2B peptide showing population of different secondary structural elements accessible to each residue.

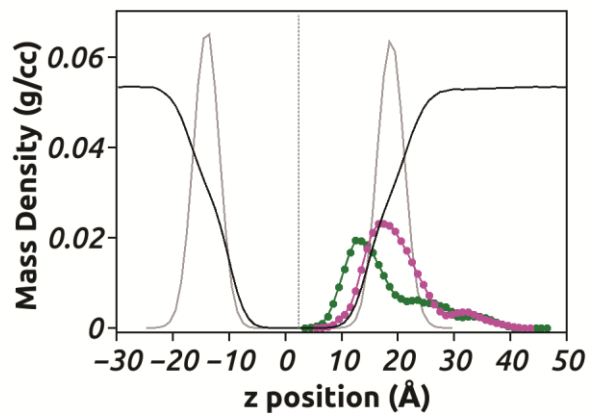

**Fig. S4** The mass density profiles along the bilayer normal (z-direction) of SS-free HAV-2B peptide in POPC bilayer. The density profiles comprising of hydrophobic (green) and hydrophilic (magenta) residues of peptide, phosphate headgroups (grey) and water (reduced by factor of 10, black) are indicated.
